# Supplementary material for: From Centroided to Profile Mode: Machine Learning for Prediction of Peak Width in HRMS Data
Source: PubMed Central journal article supplement — Anal Chem. 2021 Nov 29;93(49):16562–70. doi: 10.1021/acs.analchem.1c03755 (PMC8674881; doi:10.1021/acs.analchem.1c03755), 2021-11-29
Supplement: ac1c03755_si_001.pdf [file ac1c03755_si_001.pdf]

# Contents

4

|   |                                                |            |
|---|------------------------------------------------|------------|
| 5 | <b>S1 Instrumental Conditions</b>              | <b>S3</b>  |
| 6 | <b>S2 Self Adjusting Centroiding Algorithm</b> | <b>S3</b>  |
| 7 | S2.1 Centroiding Parameters . . . . .          | S3         |
| 8 | <b>References</b>                              | <b>S11</b> |

## 9 S1 Instrumental Conditions

10 The detailed information related to the datasets used in this study are provided in Table S1.

Table S1: The list samples, ionization mode, vendor, and the associated reference.

| nr | Sample Type           | Ionization Mode | Vendor  | Reference                |
|----|-----------------------|-----------------|---------|--------------------------|
| 1  | Wastewater Influent   | Positive        | Sciex   | <sup>1</sup>             |
| 2  | Wastewater Influent   | Negative        | Sciex   | <sup>2,3</sup>           |
| 3  | Produced Water        | Positive        | Waters  | <sup>4</sup>             |
| 4  | Produced Water        | Negative        | Waters  | <sup>4</sup>             |
| 5  | Surface Water Extract | Positive        | Agilent | unpublished <sup>a</sup> |
| 6  | Surface Water Extract | Negative        | Agilent | unpublished <sup>a</sup> |
| 7  | Biosolids             | Positive        | Waters  | <sup>5</sup>             |

<sup>a</sup> Samples were prepared following extraction<sup>4</sup> and analysis<sup>5</sup> procedures detailed elsewhere.

## 11 S2 Self Adjusting Centroiding Algorithm

### 12 S2.1 Centroiding Parameters

Table S2: The list of parameters, their description, and the used value for centroiding of the data.

| nr | Input                    | Description                                              | value |
|----|--------------------------|----------------------------------------------------------|-------|
| 1  | raw data                 | raw data in mzXML format                                 | -     |
| 2  | min intensity            | minimum absolute intensity for signal                    | 1000  |
| 3  | resolution               | nominal resolution                                       | 20000 |
| 4  | R <sup>2</sup> threshold | threshold for goodness of fit                            | 0.8   |
| 5  | signal to background     | the ratio of the apex to the median signal in the window | 1.5   |

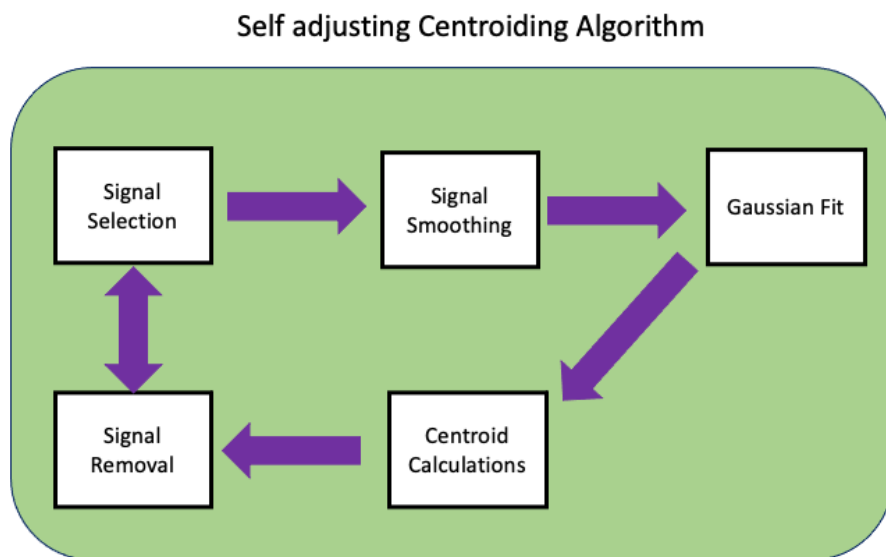

Figure S1: The workflow of the self adjusting centroiding algorithm.

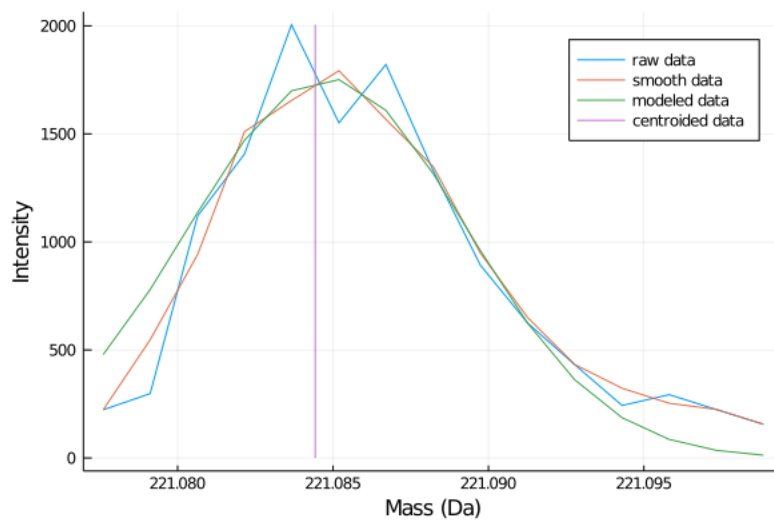

Figure S2: The signal of a successfully detected and centroided peak.

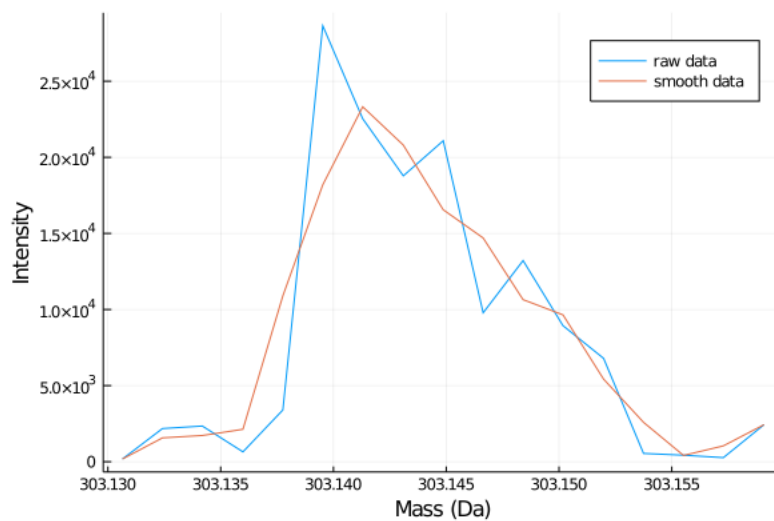

Figure S3: The signal of false negative peak where the algorithm fails to detect and centroid the peak.

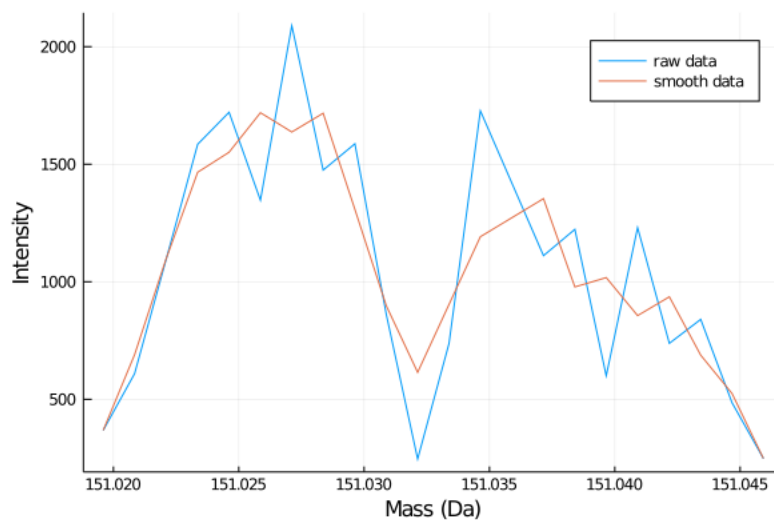

Figure S4: The signal of a true negative assessment by the algorithm. The signal does not belong to a peak, and has been assessed as such.

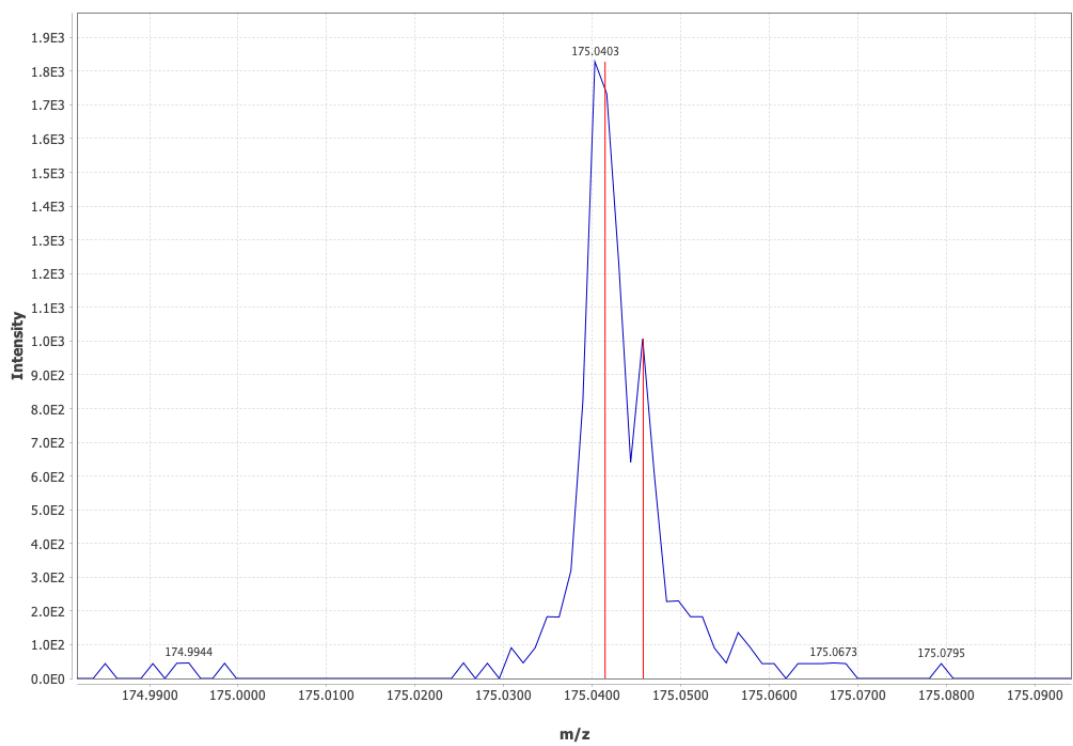

Figure S5: Shows the signal of a true positive (the main peak) and a false positive (the shoulder peak) detected by Centroiding algorithm implemented via MzMine2.<sup>6</sup>

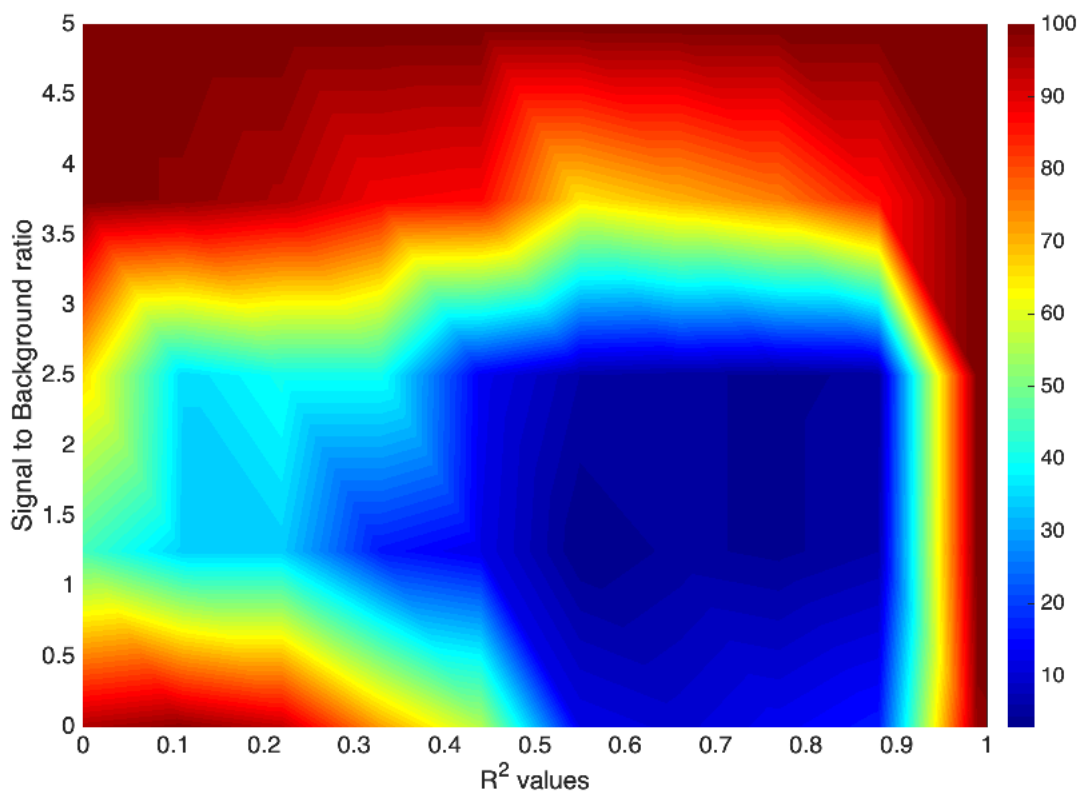

Figure S6: shows the total number of false detection (i.e. the sum of false positives and false negatives) as a function of  $R^2$  and the signal to background ratio.

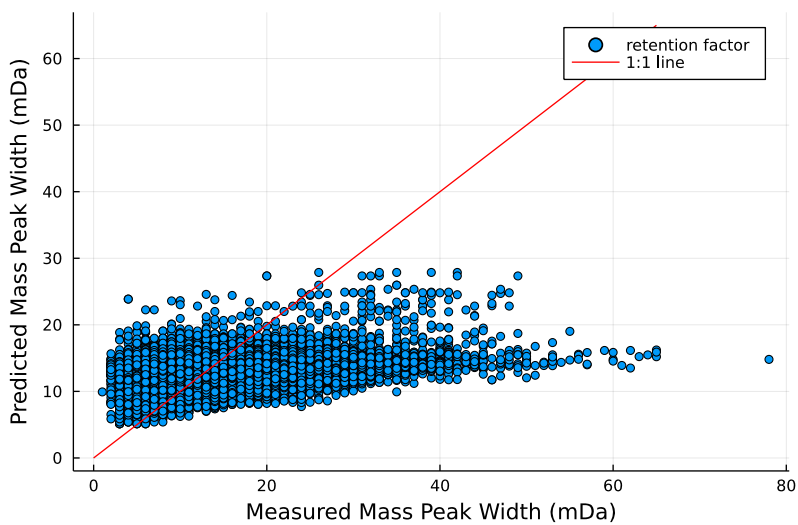

Figure S7: shows the random forest model based on 10000 randomly selected retention factors.

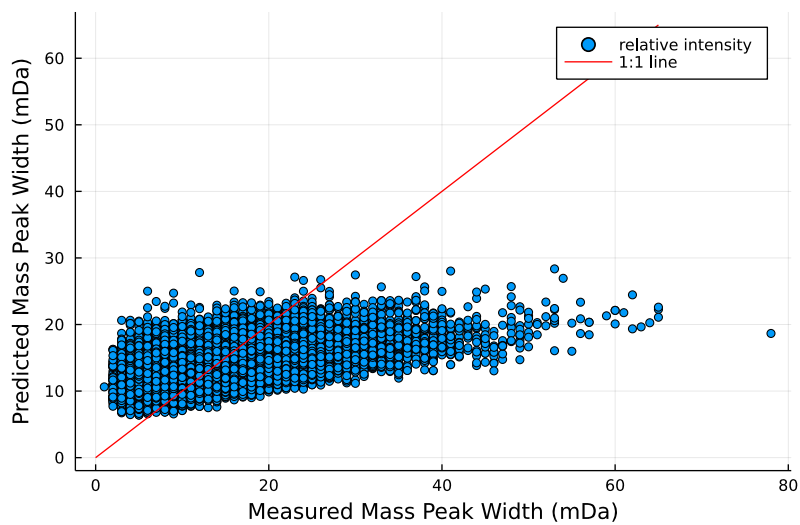

Figure S8: shows the random forest model based on 10000 randomly selected relative intensities.

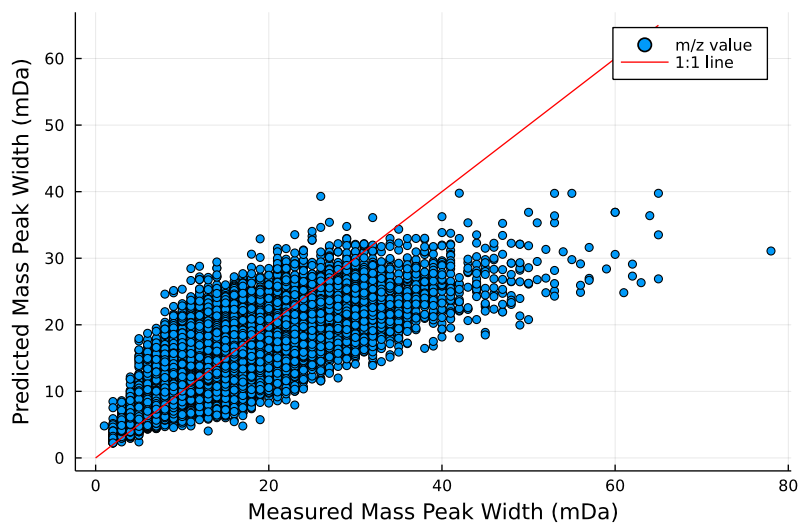

Figure S9: shows the random forest model based on 10000 randomly selected m/z values.



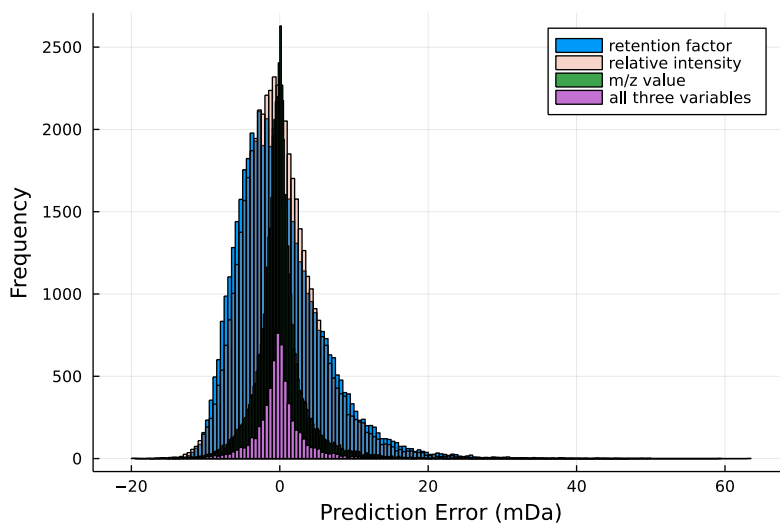

Figure S10: shows the prediction error (mDa) distribution of four models using individual variables as well as all three variables together.

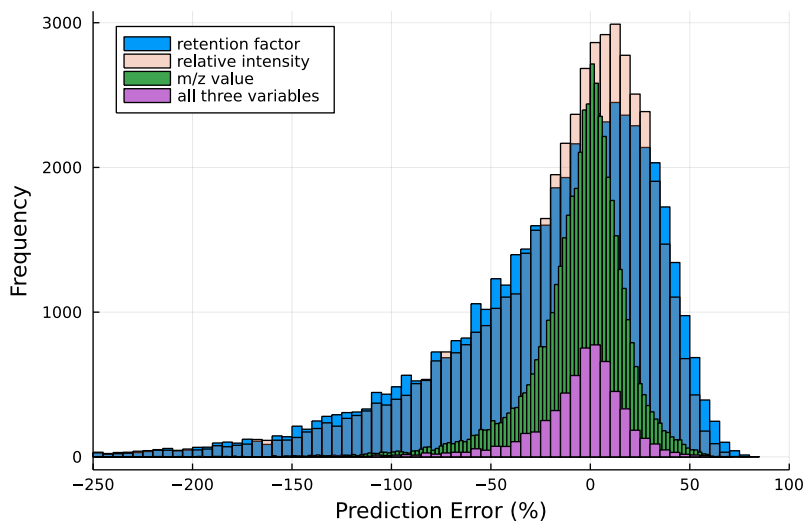

Figure S11: shows the prediction error (%) distribution of four models using individual variables as well as all three variables together.

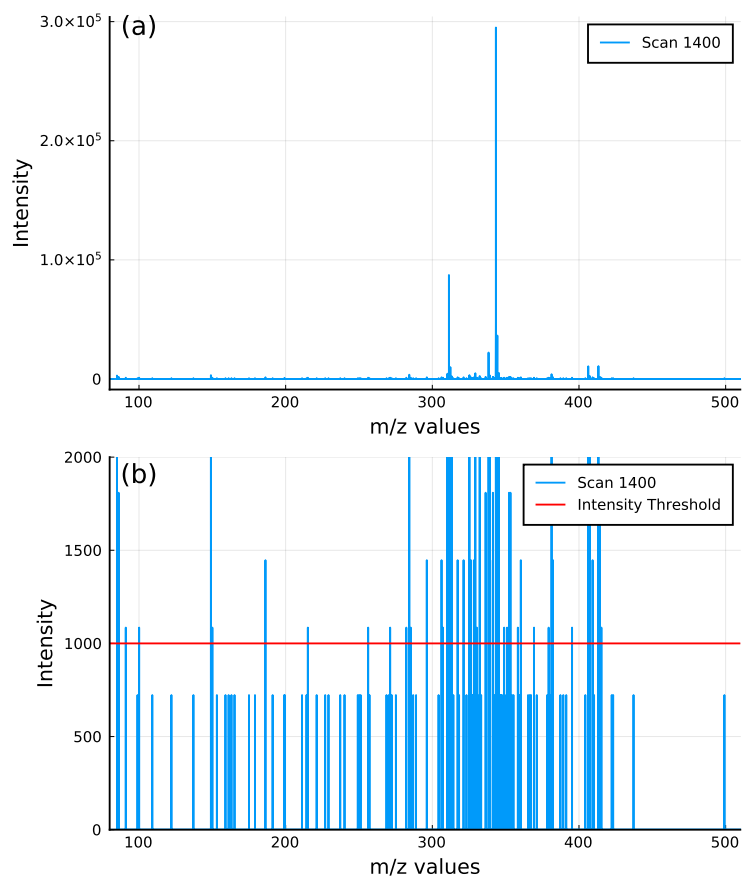

Figure S12: shows (a) the raw signal at scan 1400 and (b) the zoomed in around the set intensity threshold of 1000 counts per second.

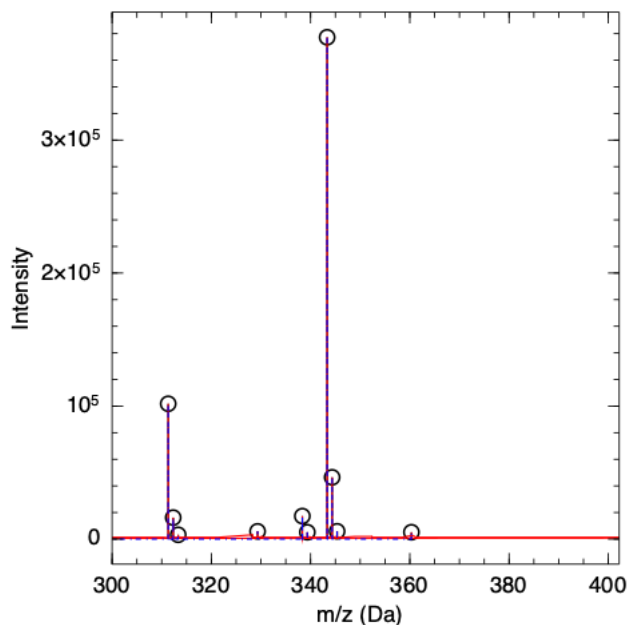

Figure S13: shows the signal of a successfully detected and centroided scan.

## 13 References

- 14 (1) Samanipour, S.; O'Brien, J. W.; Reid, M. J.; Thomas, K. V. Self adjusting algorithm  
 15 for the nontargeted feature detection of high resolution mass spectrometry coupled with  
 16 liquid chromatography profile data. *Anal. Chem.* **2019**, *91*, 10800–10807.
- 17 (2) Choi, P. M.; O'Brien, J. W.; Tscharke, B. J.; Mueller, J. F.; Thomas, K. V.; Sama-  
 18 nipour, S. Population socioeconomics predicted using wastewater. *Environ. Sci. Technol.*  
 19 *Lett.* **2020**, *7*, 567–572.
- 20 (3) Choi, P. M.; Tscharke, B.; Samanipour, S.; Hall, W. D.; Gartner, C. E.; Mueller, J. F.;  
 21 Thomas, K. V.; O'Brien, J. W. Social, demographic, and economic correlates of food  
 22 and chemical consumption measured by wastewater-based epidemiology. *PNAS* **2019**,  
 23 *116*, 21864–21873.
- 24 (4) Samanipour, S.; Hooshyari, M.; Baz-Lomba, J. A.; Reid, M. J.; Casale, M.;

- 25 Thomas, K. V. The effect of extraction methodology on the recovery and distribution of  
26 naphthenic acids of oilfield produced water. *Sci. Total Environ.* **2019**, *652*, 1416–1423.
- 27 (5) Samanipour, S.; Reid, M. J.; Thomas, K. V. Statistical variable selection: an alternative  
28 prioritization strategy during the nontarget analysis of LC-HR-MS data. *Anal. Chem*  
29 **2017**, *89*, 5585–5591.
- 30 (6) Pluskal, T.; Castillo, S.; Villar-Briones, A.; Orešič, M. MZmine 2: modular framework for  
31 processing, visualizing, and analyzing mass spectrometry-based molecular profile data.  
32 *BMC bioinformatics* **2010**, *11*, 1–11.
